## PERSPECTIVAS

### EDITORIALES

**441 Desenredando el tratamiento de la agitación en la enfermedad de Alzheimer**

*Robert J. Howard, M.D., M.R.C.Psych.*

**444 Optimización de la adherencia y los resultados en psicoterapia**

*Barney R. Vaughan, M.D., Elizabeth S. Ochoa, Ph.D.*

**446 ¿Un opioide para la depresión?**

*Thomas R. Kosten, M.D.*

**448 La función GABA del cerebro y la psicosis**

*Lawrence S. Kegeles, M.D., Ph.D.*

### INTROSPECCIÓN

**450 Buscando las semillas de la psicosis**

*Dolores Malaspina, M.D., M.S., M.S.P.H.*

### TRATAMIENTO EN PSIQUIATRÍA

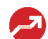

**452 La emergencia de un modelo generalista para cubrir necesidades de salud mental de los pacientes con trastorno límite de la personalidad**

*John G. Gunderson, M.D.* CME • AUDIO • CLINICAL GUIDANCE

### IMÁGENES EN PSIQUIATRÍA

**459 Abbé Faria (1756–1819): Del sueño lúcido a la hipnosis**

*Margaret Roberts, M.D.*

### [EDUCATION] EN PSIQUIATRÍA

**461 La revista de los residentes del *American Journal of Psychiatry*: Formando la próxima generación de psiquiatras académicos**

*Tobias Wasser, M.D., et al.*

## NUEVAS INVESTIGACIONES

### ARTÍCULOS

**465 Heterogeneidad de la respuesta al tratamiento con citalopram para pacientes con la enfermedad de Alzheimer con agresión o agitación: El ensayo clínico aleatorizado CitAD**

*Lon S. Schneider, M.D., M.S., et al.* EDITORIAL • AUDIO • CLINICAL GUIDANCE

**473 Efectos del citalopram en los síntomas neuropsiquiátricos en la demencia de Alzheimer: Evidencia del estudio CitAD**

*Anne K. Leonpacher, M.D., et al.* EDITORIAL • CLINICAL GUIDANCE

**481 Resultados divergentes en terapia cognitivo-conductual y farmacoterapia para la depresión adulta**

*Jeffrey R. Vittengl, Ph.D., et al.* EDITORIAL • VIDEO • CLINICAL GUIDANCE

**491 Dosis ultra-baja de buprenorfina como tratamiento de duración limitada para la ideación suicida severa: Un ensayo controlado aleatorizado**

*Yoram Yovell, M.D., Ph.D., et al.* EDITORIAL • AUDIO • VIDEO • CLINICAL GUIDANCE

**499 Modulación de opioides con buprenorfina/samidofan como tratamiento adyuvante para la respuesta inadecuada a los antidepresivos: Un ensayo aleatorizado, doble ciego, controlado con placebo**

*Maurizio Fava, M.D., et al.* EDITORIAL • AUDIO

**509 Suplementación perinatal con fosfatidilcolina y problemas comportamentales en la primera infancia: Evidencia de la Moderación del gen CHRNA7**

*Randal G. Ross, M.D., et al.* CME • AUDIO

**517 Mecanismos comunes y disociables de la disfunción del sistema ejecutivo en trastornos psiquiátricos en los jóvenes**

*Sheila Shanmugan, B.A., et al.* CME • AUDIO

## 527 Niveles prefrontales de GABA medidos con espectroscopia de resonancia magnética en pacientes con psicosis y hermanos no afectados.

Stefano Marengo, M.D., et al. EDITORIAL

### COMUNICADOS Y ACTUALIZACIONES

#### CARTAS AL EDITOR

### 535 Resultados del proyecto RAISE-ETP explicados por sesgo de selección y no por el programa de psicosis temprana

Andrew James Amos, M.B.B.S., F.R.A.N.Z.C.P.

### 535 Respuesta a Amos: Abordando los presuntos fallos metodológicos en los resultados del proyecto RAISE-ETP

John M. Kane, M.D., et al.

### 536 Comentario sobre los análisis y las conclusiones de «Actividad microglial en personas con riesgo ultra alto de psicosis y en esquizofrenia: Un estudio de imágenes del cerebro con TEP [11C]PBR28 PET»

Raj Narendran, M.D., and W. Gordon Frankle, M.D.

### 537 Respuesta a Narendran and Frankle: La interpretación de las imágenes microgliales con PET en esquizofrenia

Peter S. Bloomfield, Ph.D., et al.

### 538 Investigación sobre los servicios de salud mental en el sistema sanitario de las fuerzas armadas

Michael C. Freed, Ph.D., E.M.T.-B., and Charles C. Engel, M.D., M.P.H.

#### RESEÑA BIBLIOGRÁFICA

### 540 Oxford American Psychiatry Library: Major Depressive Disorder [Trastorno depresivo mayor]

Christopher C. Abbott, M.D., M.S.

### 541 The Persona of Ingmar Bergman: Conquering Demons Through Film [La persona de Ingmar Bergman: Conquistando demonios a través del cine]

Isabelle Guillemet, M.D., and Robert D. Davies, M.D.

### 541 The Psychiatric Interview in Clinical Practice, Third Edition [La entrevista psiquiátrica en la consulta clínica, Tercera edición]

Robert Freedman, M.D.

#### [APA OFFICIAL ACTIONS]

### 543 Pautas de la Asociación Norteamericana de Psiquiatría sobre el uso de antipsicóticos para tratar la agitación o la psicosis en pacientes con demencia

Victor I. Reus, M.D., et al.

### OTROS TEMAS DE INTERÉS

#### 547 Educación Médica Continuada

**Cubierta:** [As the population ages, concerns have grown about the impact of dementia on psychiatric symptoms, particularly agitation and aggression. This issue features two studies from the Citalopram for Agitation in Alzheimer Disease (CitAD) study. Schneider and colleagues (p. 465) compared the efficacy of citalopram and placebo in approximately 200 patients with Alzheimer disease and found that citalopram produced greater response than placebo in outpatients with signs of moderately severe dementia. Leonpacher and colleagues (p. 473) conducted secondary analyses of the data and noted that citalopram produced greater effects on psychosis and irritability than placebo.]

Article content that addresses **Core Competencies**, defined by the Accreditation Council of Graduate Medical Education and the American Board of Medical Specialties, is indicated by the following symbols:

 Professionalism

 Patient Care and Procedural Skills

 Medical Knowledge

 Practice-Based Learning and Improvement

 Interpersonal and Communication Skills

 Systems-Based Practice.

More information is available at [www.abms.org/maintenance\\_of\\_certification/MOC\\_competencies.aspx](http://www.abms.org/maintenance_of_certification/MOC_competencies.aspx)

**AUDIO** Highlighted in AJP Audio, a downloadable .mp3 file available at [ajp.psychiatryonline.org](http://ajp.psychiatryonline.org)

**CME** A course covering the content of this article is available online for paid subscribers to the AJP CME Course program

**EDITORIAL** Discussed in one of the issue's editorials

**GUÍAS CLÍNICAS** Clinical Guidance provided on the English table of contents

**VIDEO** Highlighted online by Deputy Editor Daniel S. Pine, M.D.

#### La Tabla de Contenidos y resúmenes de Este Número Está Disponible en Español

(This issue's Table of Contents and abstracts are available in Spanish)

Translation presented in collaboration with the Office of Global Health, Rutgers-Robert Wood Johnson Medical School

Support for this effort provided by ACTA Colombia.

#### Translation courtesy of

**Sergi Casals, M.A.**, Garuna, Medellín, Colombia ([www.garunaeditors.com](http://www.garunaeditors.com))

**Carlos Lopez Jaramillo, M.D.**, Universidad de Antioquia, Medellín, Colombia

**Javier I. Escobar, M.D., M.Sc.**, Rutgers-Robert Wood Johnson Medical School

## Heterogeneidad de la respuesta al tratamiento con citalopram para pacientes con la enfermedad de Alzheimer con agresión o agitación: El ensayo clínico aleatorizado CitAD

Lon S. Schneider, M.D., M.S., Constantine Frangakis, Ph.D., Lea T. Drye, Ph.D., D.P. Devanand, M.D., Christopher M. Marano, M.D., Jacob Mintzer, M.D., M.B.A., Benoit H. Mulsant, M.D., M.S., Cynthia A. Munro, Ph.D., Jeffery A. Newell, B.A., Sonia Pawluczyk, M.D., Gregory Pelton, M.D., Bruce G. Pollock, M.D., Ph.D., Anton P. Porsteinsson, M.D., Peter V. Rabins, M.D., Lisa Rein, Sc.M., Paul B. Rosenberg, M.D., David Shade, J.D., Daniel Weintraub, M.D., Jerome Yesavage, M.D., Constantine G. Lyketsos, M.D., M.H.S., for the CitAD Research Group

**Objetivo:** Los tratamientos farmacológicos para agitación y agresión en pacientes con la enfermedad de Alzheimer han mostrado eficacia limitada. Los autores evaluaron la heterogeneidad de la respuesta al citalopram en el estudio *Citalopram para la Agitación en la Enfermedad de Alzheimer* (CitAD, por sus siglas en inglés) para identificar a los individuos a quienes se les puede ayudar o perjudicar.

**Método:** En este ensayo multicéntrico, de grupos paralelos y doble ciego, de 186 pacientes con enfermedad de Alzheimer y agitación clínicamente significativa, los participantes fueron asignados aleatoriamente para recibir citalopram o placebo durante 9 semanas, con la dosis calibrada a 30 mg/día para las 3 primeras semanas. Se evaluaron 5 predictores potenciales planificados del resultado del tratamiento y seis predictores adicionales. Los autores utilizaron un método multivariado de dos etapas para seleccionar los predictores más probables; agruparon los participantes en 10 subgrupos según sus puntuaciones del índice; y estimaron el efecto del tratamiento con citalopram para cada caso.

**Resultados:** Cinco covariables fueron predictores probables,

y el efecto del tratamiento fue heterogéneo en los diferentes subgrupos. Los pacientes para los que el citalopram fue más efectivo era más probable que fueran pacientes ambulatorios, que tuvieran menor deterioro cognitivo, que tuvieran agitación moderada y que estuvieran en el rango medio de edad (76-82 años). Los pacientes para los cuales fue más efectivo el placebo era más probable que estuvieran en atención a largo plazo, que tuvieran un deterioro cognitivo más severo y mayor agitación y que fueran tratados con lorazepam.

**Conclusiones:** Considerar conjuntamente varias covariables permitió identificar los tipos de respuesta. Las personas con agitación moderada y niveles bajos de deterioro cognitivo tenían más probabilidades de beneficiarse del citalopram, y las que presentaban agitación más severa y mayor deterioro cognitivo tenían mayor riesgo de respuestas adversas. Considerando las dosis utilizadas y la asociación del citalopram con la prolongación del QT cardíaco, el uso de este agente para tratar la agitación puede estar limitado a un subgrupo de personas con demencia.

(*Am J Psychiatry* 2016; 173:465–472)

## Efectos del citalopram en los síntomas neuropsiquiátricos en la demencia de Alzheimer: Evidencia del estudio CitAD

Anne K. Leonpacher, M.D., Matthew E. Peters, M.D., Lea T. Drye, Ph.D., Kelly M. Makino, B.S., Jeffery A. Newell, B.A., D.P. Devanand, M.D., Constantine Frangakis, Ph.D., Cynthia A. Munro, Ph.D., Jacobo E. Mintzer, M.D., Bruce G. Pollock, M.D., Ph.D., Paul B. Rosenberg, M.D., Lon S. Schneider, M.D., David M. Shade, J.D., Daniel Weintraub, M.D., Jerome Yesavage, M.D., Constantine G. Lyketsos, M.D., M.H.S., Anton P. Porsteinsson, M.D., for the CitAD Research Group

**Objetivo:** Se ha demostrado que el citalopram mejora la agitación en los pacientes con la enfermedad de Alzheimer. Los autores evaluaron si otros síntomas neuropsiquiátricos mejoran con el tratamiento con citalopram comparado con placebo.

**Método:** En este análisis secundario planeado del estudio CitAD (Citalopram para la Agitación en la Enfermedad de Alzheimer), los autores evaluaron el efecto del citalopram en los 12 dominios de los síntomas neuropsiquiátricos evaluados por el Inventario Neuropsiquiátrico (NPI, por sus siglas en inglés). Compararon las puntuaciones en el NPI reportadas por los cuidadores en la semana 9 en pacientes que tomaban citalopram (30 mg/día) o placebo, con respecto tanto a la presencia como a la ausencia de síntomas neuropsiquiátricos individuales, y las puntuaciones individuales de dominio (que reflejaban la severidad) en los participantes que presentaban síntomas en la semana 9.

**Resultados:** En la semana 9, era significativamente menos probable que los participantes tratados con citalopram pre-

sentaran ideas delirantes (*odds ratio*=0,40), ansiedad (*odds ratio*=0,43) e irritabilidad/ labilidad (*odds ratio*=0,38). Una comparación de las medianas de las puntuaciones de los participantes que presentaban síntomas en la semana 9 mostró diferencias significativas que favorecen el citalopram para las alucinaciones y el placebo para los trastornos de comportamiento del sueño/nocturnos.

**Conclusiones:** Si bien deben considerarse las restricciones de dosificación debido al perfil de efectos adversos del citalopram, los efectos terapéuticos generales de este agente en pacientes con enfermedad de Alzheimer y agitación, además de eficacia para la agitación/agresión, incluyeron reducciones de la frecuencia de irritabilidad, ansiedad e ideas delirantes. Entre los pacientes que presentaban estos síntomas en la semana 9, incluyeron una reducción de la severidad de las alucinaciones, pero un aumento de la severidad de los trastornos del sueño/nocturnos.

(*Am J Psychiatry* 2016; 173:473–480)

## Resultados divergentes en terapia cognitivo-conductual y farmacoterapia para la depresión adulta

Jeffrey R. Vittengl, Ph.D., Robin B. Jarrett, Ph.D., Erica Weitz, M.A., Steven D. Hollon, Ph.D., Jos Twisk, Ph.D., Ioana Cristea, Ph.D., Daniel David, Ph.D., Robert J. DeRubeis, Ph.D., Sona Dimidjian, Ph.D., Boadie W. Dunlop, M.D., M.S., Mahbobeh Faramarzi, Ph.D., Ulrich Hegerl, M.D., Ph.D., Sidney H. Kennedy, M.D., Farzan Kheirkhah, M.D., Roland Mergl, Ph.D., Jeanne Miranda, Ph.D., David C. Mohr, Ph.D., A. John Rush, M.D., Zindel V. Segal, Ph.D., Juned Siddique, Dr.P.H., Anne D. Simons, Ph.D., Pim Cuijpers, Ph.D.

**Objetivo:** Aunque el paciente deprimido promedio se beneficia moderadamente de la terapia cognitivo-conductual (TCC) o de la farmacoterapia, algunos experimentan resultados divergentes. Los autores evaluaron frecuencias, predictores y moderadores de los resultados negativos y de los atípicamente positivos.

**Método:** Dieciséis ensayos clínicos aleatorios que comparaban la TCC y la farmacoterapia para depresión unipolar en 1.700 pacientes ofrecieron puntuaciones individuales pre- y post tratamiento en la Escala de Evaluación de la Depresión de Hamilton (HAM-D) y/o el Inventario de Depresión de Beck (BDI). Los autores examinaron los predictores demográficos y clínicos y los moderadores del tratamiento de cualquier deterioro (aumento  $\geq 1$  punto en HAM-D o BDI), deterioro confiable (aumento  $\geq 8$  puntos en HAM-D o  $\geq 9$  puntos en BDI), no respuesta extrema (puntuación HAM-D post-tratamiento  $\geq 21$  o puntuación en BDI  $\geq 31$ ), mejora superior (disminución  $\geq 95\%$  en HAM-D o BDI) y respuesta superior (puntuación post-tratamiento de 0 en HAM-D o BDI) utilizando modelos multinivel.

**Resultados:** Aproximadamente 5%–7% de los pacientes mostraron algún deterioro, 1% deterioro confiable, 4%–5% no respuesta extrema, 6%–10% mejora superior y 4%–5% respuesta superior. La mejora superior solamente en la escala HAM-D (*odds ratio*=1,67) y la deserción (*odds ratio*=1,67) fueron más frecuentes en farmacoterapia que en TCC. Los pacientes con deterioro o respuesta superior tuvieron niveles más bajos de síntomas pre-tratamiento, mientras que los pacientes con no respuesta extrema o con mejora superior tuvieron niveles más altos.

**Conclusiones:** El deterioro y la no respuesta extrema, y de modo similar, la mejora superior y la respuesta superior, ambos ocurren con poca frecuencia en ensayos clínicos aleatorizados que comparan la TCC con la farmacoterapia. Los niveles de síntomas pre-tratamiento ayudan a predecir los resultados negativos y los atípicamente positivos pero no guían la selección de la TCC vs. farmacoterapia. La farmacoterapia puede producir mejora superior evaluada clínicamente y causar deserción con más frecuencia que la TCC.

(*Am J Psychiatry* 2016; 173:481–490)

## Dosis ultra-baja de buprenorfina como tratamiento de duración limitada para la ideación suicida severa: Un ensayo controlado aleatorizado

Yoram Yovell, M.D., Ph.D., Gali Bar, Ph.D., Moti Mashiah, M.D., Yehuda Baruch, M.D., Irina Briskman, M.D., Jack Asherov, M.D., Amit Lotan, M.D., Amihai Rigbi, Ph.D., Jaak Panksepp, Ph.D.

**Objetivo:** La ideación y el comportamiento suicidas actualmente no tienen ningún tratamiento de acción rápida que sea adecuado para el uso con pacientes ambulatorios independientes. La suicidalidad está ligada al dolor mental, que es modulado por el sistema de separación del desasosiego a través de opioides endógenos. Los autores evaluaron la eficacia y la seguridad de dosis muy bajas de buprenorfina como tratamiento de duración limitada para ideación suicida severa.

**Método:** Fue un ensayo multicéntrico, aleatorizado, doble ciego y controlado con placebo, de dosis sublinguales ultra-bajas de buprenorfina como tratamiento adyuvante. Varios pacientes suicidas sin abuso de sustancias fueron asignados aleatoriamente para recibir o bien buprenorfina o bien placebo (en una proporción 2:1), además del tratamiento individual que cada uno seguía. La medida de resultado primario fue el cambio en la ideación suicida, evaluado con la Escala de Ideación Suicida de Beck al final de cada periodo de 4 semanas de tratamiento.

**Resultados:** Los pacientes que recibieron buprenorfina en

dosis ultra-bajas (dosis inicial=0,1 mg una o dos veces al día; dosis final media=0,44 mg/día; N=40) tuvieron una mayor reducción en las puntuaciones de la Escala de Ideación Suicida de Beck que los pacientes que recibieron placebo (N=22), ambos después de 2 semanas (diferencia media -4,3; IC 95% =-8,5 a -0,2) y después de 4 semanas (diferencia media=-7,1; IC 95%=-12,0 a -2,3). El uso de antidepresivos concurrente con un diagnóstico de trastorno límite de la personalidad no afectó la respuesta a la buprenorfina. No se reportaron síntomas de abstinencia después de la discontinuación del tratamiento al final del estudio.

**Conclusiones:** El uso de corta duración y a corto plazo de dosis muy bajas de buprenorfina sublingual se asoció con la reducción de la ideación suicida en pacientes suicidas severos sin abuso de sustancias. Es necesaria más investigación para establecer la eficacia, la seguridad, la dosificación y las poblaciones de pacientes apropiadas para este tratamiento experimental.

(*Am J Psychiatry* 2016; 173:491-498)

## Modulación de opioides con buprenorfina/samidorfan como tratamiento adyuvante para la respuesta inadecuada a los antidepresivos: Un estudio aleatorizado, doble ciego, controlado con placebo

Maurizio Fava, M.D., Asli Memisoglu, Sc.D., Michael E. Thase, M.D., J. Alexander Bodkin, M.D., Madhukar H. Trivedi, M.D., Marc de Somer, M.D., M.P.H., Yangchun Du, Ph.D., Richard Leigh-Pemberton, M.D., Lauren DiPetrillo, Ph.D., Bernard Silverman, M.D., Elliot Ehrich, M.D.

**Objetivo:** El trastorno depresivo mayor se ha asociado con la desregulación del sistema opioide endógeno. El objetivo de los autores fue determinar si la modulación de opioides lograda a partir de la administración de ALKS 5461, una combinación de un antagonista opioide parcial  $\mu$  y  $\kappa$ , buprenorfina y un antagonista opioide  $\mu$ , samidorfan, mostraría actividad de los antidepresivos en pacientes con depresión mayor.

**Método:** Un estudio de comparación de diseño paralelo, secuencial, de dos etapas, controlado con placebo, doble ciego, aleatorizado y multicéntrico se llevó a cabo en adultos con depresión mayor que tenían una respuesta inadecuada a uno o dos tratamientos con antidepresivos. Los participantes fueron asignados de forma aleatoria para recibir tratamiento adyuvante con 2 mg/2 mg de buprenorfina/ samidorfan (el grupo de dosis 2/2), 8 mg/8 mg de buprenorfina/ samidorfan (el grupo de dosis 8/8), o placebo. El efecto de los antidepresivos se midió con base en el cambio desde la línea basal hasta el final de 4 semanas de tratamiento en la Escala de Evaluación de Depresión de Hamilton de 17 ítems (HAM-D), la Escala de Evaluación de Depresión de Montgo-

mery-Åsberg (MADRS) y la Escala de Gravedad de *Clinical Global Impressions* (CGI-S).

**Resultados:** En comparación con el grupo de placebo, hubo mejoras significativamente mayores en el grupo de dosis 2/2 en las tres medidas de resultado de depresión (HAM-D:  $-2,8$ ; IC 95%= $-5,1$  a  $-0,6$ ); MADRS:  $-4,9$ ; IC 95%= $-8,2$  a  $-1,6$ ); CGI-S:  $-0,5$ ; IC 95%= $-0,9$  a  $-0,1$ ). También hubo evidencia de mejora en el grupo de dosis 8/8, aunque no alcanzó a ser estadísticamente significativa. En general, las combinaciones buprenorfina/ samidorfan fueron bien toleradas y no hubo evidencia de abstinencia de opioides después de discontinuar el tratamiento.

**Conclusiones:** La combinación buprenorfina/ samidorfan es un candidato novedoso y prometedor para el tratamiento del trastorno depresivo mayor en pacientes que tienen una respuesta inadecuada a los antidepresivos estándar.

(*Am J Psychiatry* 2016; 173:499–508)

## Suplementación perinatal con fosfatidilcolina y problemas comportamentales en la primera infancia: Evidencia de la Moderación del gen CHRNA7

Randal G. Ross, M.D., Sharon K. Hunter, Ph.D., M. Camille Hoffman, M.D., Lizbeth McCarthy, M.D., Betsey M. Chambers, R.N., M.S., Amanda J. Law, Ph.D., Sherry Leonard, M.D., Gary O. Zerbe, Ph.D., Robert Freedman, M.D.

**Objetivo:** Los receptores nicotínicos  $\alpha$  están implicados en la maduración final de las sinapsis inhibitorias del GABA antes del nacimiento. La colina en los niveles en los que se encuentra en el líquido amniótico es un antagonista en los receptores nicotínicos  $\alpha 7$ . Los autores realizaron un ensayo doble ciego, controlado con placebo para evaluar la suplementación con fosfatidilcolina oral en dosis altas durante el embarazo para aumentar los niveles de colina del líquido amniótico materno y, como resultado, reducir los problemas comportamentales de la infancia relacionados con esa enfermedad mental.

**Método:** Los autores habían reportado que los recién nacidos en el grupo de fosfatidilcolina han aumentado la supresión de la respuesta cerebral evocada a repetidos estímulos auditivos. En este seguimiento, reportan evaluaciones parentales del comportamiento de los hijos a los 40 meses de edad, utilizando la lista de chequeo del comportamiento infantil (*Child Behavior Checklist*).

**Resultados:** A los 40 meses, las evaluaciones que los padres habían hecho de los hijos en el grupo de fosfatidilcolina

(N=23) indicaron menos problemas de atención y menos aislamiento social comparado con el grupo de placebo (N=26). La mejora es comparable en magnitud a déficits similares en esta etapa asociados con esquizofrenia posterior. El comportamiento de los niños es moderado por las variantes del gen CHRNA7 asociadas con enfermedad mental posterior y está relacionado con su inhibición cerebral acentuada como recién nacidos.

**Conclusiones:** El gen CHRNA7, receptor nicotínico  $\alpha 7$  de acetilcolina, se ha asociado con la esquizofrenia, el autismo y el trastorno de atención e hiperactividad. El tratamiento materno de fosfatidilcolina puede, activando el receptor nicotínico  $\alpha 7$  de acetilcolina, alterar el desarrollo de los problemas comportamentales en la primera infancia que puedan presagiar enfermedad mental posterior.

(*Am J Psychiatry* 2016; 173:509–516)



## Mecanismos comunes y disociables de la disfunción del sistema ejecutivo en trastornos psiquiátricos en los jóvenes

Sheila Shanmugan, B.A., Daniel H. Wolf, M.D., Ph.D., Monica E. Calkins, Ph.D., Tyler M. Moore, Ph.D., Kosha Ruparel, M.S.E., Ryan D. Hopson, B.A., Simon N. Vandekar, B.S., David R. Roalf, Ph.D., Mark A. Elliott, Ph.D., Chad Jackson, M.S.E., Efstathios D. Gennatas, M.B.B.S., Ellen Leibenluft, M.D., Daniel S. Pine, M.D., Russell T. Shinohara, Ph.D., Hakon Hakonarson, M.D., Ph.D., Ruben C. Gur, Ph.D., Raquel E. Gur, M.D., Ph.D., Theodore D. Satterthwaite, M.D., M.A.

**Objetivo:** La disrupción de la función ejecutiva está presente en muchos trastornos neuropsiquiátricos. Sin embargo, determinar la especificidad de la disfunción ejecutiva en todos estos trastornos es un reto, dada la alta comorbilidad de las enfermedades. Aquí los autores investigan los déficits del sistema ejecutivo en relación a las dimensiones de los síntomas psiquiátricos en los jóvenes, utilizando un paradigma de la memoria de trabajo. La hipótesis de los autores fue que los patrones comunes y disociables de la disfunción estarían presentes.

**Método:** Los autores estudiaron 1.129 jóvenes que completaron una tarea n-back fractal durante una sesión de resonancia magnética funcional en 3T como parte de la *Philadelphia Neurodevelopmental Cohort* (Cohorte de neurodesarrollo de Filadelfia). La puntuación de los factores de psicopatología clínica se calcularon utilizando un modelo bifactorial confirmatorio de cada ítem, que describe la psicopatología general y cuatro dimensiones ortogonales de los síntomas: ansioso-miseria (estado del ánimo y ansiedad), perturbación comportamental (trastorno por déficit de atención e hiperactividad y trastorno de la conducta), y miedo (fobias). Se examinó el efecto de las dimensiones de psicopatología en el rendi-

miento comportamental y el reclutamiento del sistema ejecutivo (2-back > 0-back) utilizando tanto análisis multivariado (regresión de matriz) como univariado (regresión lineal).

**Resultados:** La psicopatología en general se asoció tanto con patrones multivariados anormales de activación como con el hecho de que no se logran activar las regiones ejecutivas en la red de control cingulo-opercular, incluyendo el polo frontal, la corteza cingulada y la ínsula anterior. Además, los síntomas del espectro de la psicosis se asociaron con la hipoactivación de la corteza prefrontal dorsolateral izquierda, mientras que los síntomas se asociaron con la hipoactivación de la corteza frontoparietal y el cerebelo. En contraste, los síntomas ansioso-miseria se asociaron con la hiperactivación extendida de la red ejecutiva.

**Conclusiones:** Estos hallazgos ofrecen nueva evidencia de que los déficits comunes y disociables en el sistema ejecutivo del cerebro están presentes en asociación con dimensiones de psicopatología en los jóvenes.

(*Am J Psychiatry* 2016; 173:517–526)

## Niveles prefrontales de GABA medidos con espectroscopia de resonancia magnética en pacientes con psicosis y hermanos no afectados.

Stefano Marengo, M.D., Christian Meyer, B.Sc., Susan Kuo, B.A., Jan Willem van der Veen, Ph.D., Jun Shen, Ph.D., Katherine DeJong, B.A., Alan S. Barnett, Ph.D., Jose A. Apud, M.D., Ph.D., Dwight Dickinson, Ph.D., Daniel R. Weinberger, M.D., Karen F. Berman, M.D.

**Objetivo:** El objetivo de los autores fue comparar los niveles de GABA en pacientes con psicosis tratados y no tratados, con los niveles en sus hermanos no afectados y sujetos control, y evaluar los efectos de las medicaciones antipsicóticas en los niveles de GABA.

**Método:** Los niveles de GABA+ (es decir, incluyendo señal de proteínas no relacionadas o macromoléculas) que hacen referencia a la creatina o al agua se estudiaron con espectroscopia de protones J-editada en la corteza dorsal anterior de 289 individuos: 184 sujetos sanos de control, 83 pacientes tratados con psicosis, 25 pacientes no tratados, 31 hermanos no afectados y 17 pacientes que se estudiaron tanto cuando no estaban tomando ninguna medicación como cuando estaban tomando un solo antipsicótico.

**Resultados:** Los niveles de GABA+ en el cíngulo anterior dorsal no difirieron entre los pacientes no tratados y los controles sanos. Para los pacientes tratados, los niveles fueron modestamente inferiores para GABA+/creatina pero no difirieron para GABA+/agua en comparación con los controles sanos. Para ambas medidas de GABA+, los hermanos no afectados tuvieron niveles significativamente inferiores en

comparación con los controles. GABA+/creatina mostró un grado modesto de familiaridad (correlación intraclase=0,36). La dosis de antipsicótico estuvo correlacionada negativamente con los niveles de GABA+, pero los estudios de pacientes con y sin medicación no indicaron ninguna diferencia en los niveles de GABA+ sobre los antipsicóticos en comparación con los estudios de pacientes que estaban sin medicación.

**Conclusiones:** GABA+/creatina en el cíngulo anterior dorsal puede constituir un fenotipo intermedio con bajo tamaño de efecto para la psicosis, pero las medidas GABA+/agua no apoyan completamente esta conclusión. Los bajos niveles de GABA+ en los hermanos no afectados podrían sugerir una asociación genética, pero el hecho de no poder encontrar evidencia consistente de este fenotipo en los mismos pacientes debilita la inferencia genética en el riesgo de psicosis. Se justifica la réplica en muestras independientes de hermanos para confirmar la potencial asociación de riesgo genético.

(*Am J Psychiatry* 2016; 173:527–534)
