# The American Journal of Psychiatry

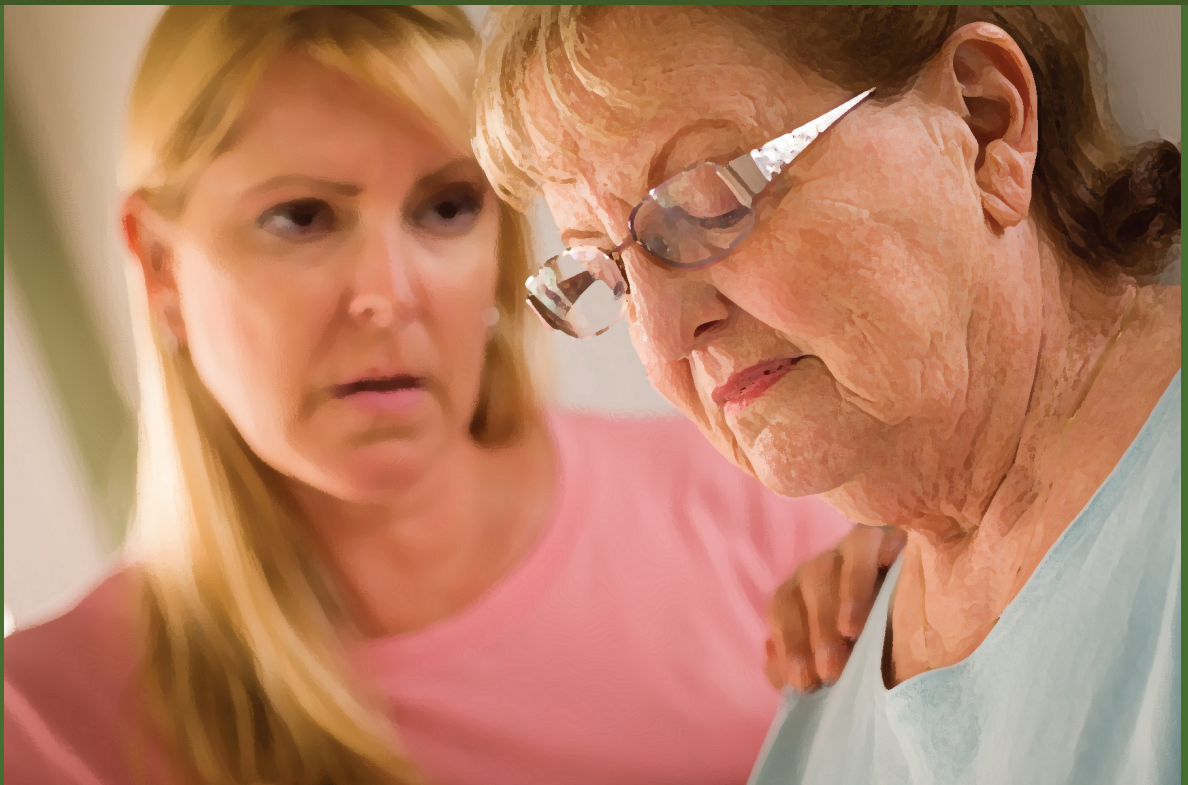

Heterogeneity of Treatment Response to Citalopram for Patients With  
Alzheimer's Disease With Aggression or Agitation

Effects of Citalopram on Neuropsychiatric Symptoms in Alzheimer's Dementia

Divergent Outcomes in Cognitive-Behavioral Therapy and  
Pharmacotherapy for Adult Depression

Perinatal Phosphatidylcholine Supplementation and Early Childhood  
Behavior Problems: Evidence for *CHRNA7* Moderation
