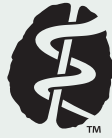

# The American Journal of Psychiatry

Official Journal of the American Psychiatric Association

## Officers 2015–2016

### President

Renée L. Binder, M.D.

### President-Elect

Maria A. Oquendo, M.D.

### Treasurer

Frank W. Brown, M.D.

### Secretary

Altha J. Stewart, M.D.

### Assembly

#### Speaker

Glenn A. Martin, M.D.

#### Speaker-Elect

Daniel J. Anzia, M.D.

#### Recorder

Theresa Miskimen, M.D.

### Office of the CEO and Medical Director

#### CEO and Medical Director

Saul Levin, M.D., M.P.A.

### Board of Trustees

Jeffrey Akaka, M.D.

Lama Bazzi, M.D.

R. Scott Benson, M.D.

Ronald M. Burd, M.D.

Stella Cai, M.D.

Brian Crowley, M.D.

Anita S. Everett, M.D.

Jeffrey L. Geller, M.D., M.P.H.

Dilip V. Jeste, M.D.

Jeffrey A. Lieberman, M.D.

Vivian B. Pender, M.D.

Gail E. Robinson, M.D.

Ravi N. Shah, M.D.

Paul Summergrad, M.D.

Melinda Young, M.D.

## Editorial Board

### Editor

Robert Freedman, M.D.

### Deputy Editors

David A. Lewis, M.D.

Robert Michels, M.D.

Daniel S. Pine, M.D.

A. John Rush, M.D.

Susan K. Schultz, M.D.

Carol A. Tamminga, M.D.

### Associate Editors

Alan Brown, M.D., M.P.H.

Tyrone Cannon, Ph.D.

Benjamin G. Druss, M.D., M.P.H.

Felton Earls, M.D.

Graham J. Emslie, M.D.

Daniel C. Javitt, M.D.

Bankole Johnson, M.D.

Joan L. Luby, M.D.

Constantine G. Lyketsos, M.D., M.H.S.

Helen S. Mayberg, M.D., F.R.C.P.C.

Terrie E. Moffitt, Ph.D.

Roy Perlis, M.D.

Anita Thapar, M.B.B.Ch., F.R.C.Psych.,

Ph.D., F.Med.Sci.

Mauricio Tohen, M.D., Dr.PH., M.B.A.

Eduard Vieta, M.D., Ph.D.

Katherine L. Wisner, M.D., M.S.

Xin Yu, M.D.

### Editor Emerita

Nancy C. Andreasen, M.D., Ph.D.

### Former Editors

Amariah Brigham, M.D., 1844–1849

T. Romeyn Beck, M.D., 1849–1854

John P. Gray, M.D., 1854–1886

G. Alder Blumer, M.D., 1886–1894

Richard Dewey, M.D., 1894–1897

Henry M. Hurd, M.D., 1897–1904

Edward N. Brush, M.D., 1904–1931

Clarence B. Farrar, M.D., 1931–1965

Francis J. Braceland, M.D., 1965–1978

John C. Nemiah, M.D., 1978–1993

### Editorial Staff

#### Executive Editor

Michael D. Roy

#### Senior Editors

John J. Guardiano, Ph.D.

Jane Weaver

#### Production Manager

Susan Westrate

#### Assistant Editor

Angela Moore

#### Online Content Manager

Michael Pogachar

#### Editorial Support Services Manager

Heidi Koch

#### Editorial Assistant

Linda LaCour

#### Editorial Assistant/ Permissions Coordinator

Elizabeth Stern

#### Assistants to the Editors

Lois Lilienthal

Laura English

Rachel Hogg

Russell A. Scholl

#### Publisher

Rebecca D. Rinehart

# The Residents' JOURNAL

## The American Journal of Psychiatry Residents' Journal

April 2016

Volume 11

Issue 4

Inside

- 2 **The Call for Integrated Care: Closer to Reality?**  
Cornie M. Lee, M.D.  
*Emphasizing the need for effective care integration for patients with medical and psychiatric comorbidities.*
- 3 **On the Same Team: How Combination Programs Can Improve Contact, Consultation, and Patient Care**  
Jacob A. Bishop, M.D.  
*Commentary on the use of stigma-reduction strategies to improve communication and cooperation between medical specialties.*
- 4 **A Call for Advocacy: How Residents Can Help Decrease Barriers to Psychiatric Care**  
Luming Li, M.D.  
*Commentary on the importance of advocacy efforts in achieving meaningful, national health care reform for individuals with psychiatric diagnoses.*
- 5 **The Burden of Mental Illness Beyond Clinical Symptoms: Impact of Stigma on the Onset and Course of Schizophrenia Spectrum Disorders**  
Gil Dov Hoffman, M.D., Ph.D.  
*Analyzing the concept of stigma and its effect on schizophrenia onset and course, with description of internalized, interpersonal, and institutional forms of stigma.*
- 8 **Management of Depression in Parkinson's Disease**  
Anna Frenklach, M.D.  
*Examining depression in Parkinson's disease, with discussion on patient evaluation and pharmacologic and non-pharmacologic management of symptoms.*
- 12 **Finding Ishmael: Using a Patient's Connection With Story to Foster Insight and Progression in Treatment**  
Ashleigh Colin, M.B.B.Ch., M.A.  
*Exploring the use of story as analogy between the universal world and patients' experiences in an effort to achieve diagnostic clarity.*
- 16 **Call for Applications to Join the 2016 Editorial Board**
- 17 **Residents' Resources**

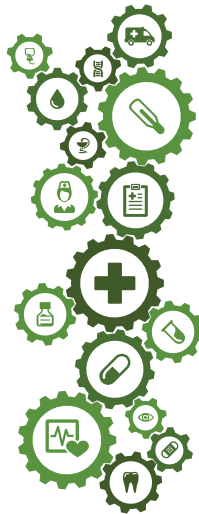

**Editor-in-Chief**  
Rajiv Radhakrishnan, M.B.B.S., M.D.

**Senior Deputy Editor**  
Katherine Pier, M.D.

**Deputy Editor**  
Hun Millard, M.D., M.A.

**Guest Editor**  
Connie M. Lee, M.D.

**Associate Editors**  
Rafik Sidaros, M.B.B.Ch.  
Janet Charoensook, M.D.

**Staff Editor**  
Angela Moore

**Editors Emeriti**  
Sarah B. Johnson, M.D.  
Molly McVoy, M.D.  
Joseph M. Cerimele, M.D.  
Sarah M. Fayad, M.D.  
Monifa Seawell, M.D.  
Arshya Vahabzadeh, M.D.  
Misty Richards, M.D., M.S.

**Editor-in-Chief**  
Rajiv Radhakrishnan, M.B.B.S., M.D.

**Senior Deputy Editor**  
Katherine Pier, M.D.

**Deputy Editor**  
Hun Millard, M.D., M.A.

**Associate Editors**  
Rafik Sidaros, M.B.B.Ch.  
Janet Charoensook, M.D.

*The Residents' Journal*, the largest and most robust resident-led journal in the house of medicine, is an e-publication that serves as a forum to share your ideas and experiences in training, clinical practice, research, and careers with your colleagues.

To submit a manuscript, please visit [mc.manuscriptcentral.com/appi-ajp](http://mc.manuscriptcentral.com/appi-ajp) and select a manuscript type for *AJP Residents' Journal*. You may submit a commentary (500 words), book review (500 words), history of psychiatry (500 words), clinical case conference (1,250 words), review article (1,500 words), treatment in psychiatry article (1,500 words), research article (1,250 words), drug review (1,500 words), or letter to the editor (250 words).

*The Residents' Journal* is sent free-of-charge to all psychiatry residents. Anyone interested in being included on the distribution list should contact Angela Moore, *The Residents' Journal* staff editor at [ajp@psych.org](mailto:ajp@psych.org) with "Subscribe to Residents' Journal" in the subject line.

To access the complete *Residents' Journal* archives, visit [ajp.psychiatryonline.org/residents\\_journal](http://ajp.psychiatryonline.org/residents_journal)

# THE AMERICAN PSYCHIATRIC ASSOCIATION

1000 Wilson Blvd., Suite 1825, Arlington, VA 22209-3901  
(888) 357-7924 (toll-free inside the U.S. and Canada) / (703) 907-7300  
web site: [www.psychiatry.org](http://www.psychiatry.org) • e-mail: [apa@psych.org](mailto:apa@psych.org)

## Chairpersons of Councils, Committees, and Task Forces

### Standing Committees

|                             |                                |
|-----------------------------|--------------------------------|
| <b>Bylaws</b>               | Rebecca W. Brendel, M.D., J.D. |
| <b>Elections</b>            | Barry K. Herman, M.D.          |
| <b>Ethics</b>               | Ezra Griffith, M.D.            |
| <b>Finance and Budget</b>   | Alan F. Schatzberg, M.D.       |
| <i>Audit</i>                | Frank W. Brown, M.D.           |
| <i>Investment Oversight</i> | David Fassler, M.D.            |
| <b>Joint Reference</b>      | Maria A. Oquendo, M.D.         |
| <b>Membership</b>           | Rahn K. Bailey, M.D.           |
| <b>Nominating</b>           | Paul Summergrad, M.D.          |
| <b>Tellers</b>              | Catherine May, M.D.            |

### Councils

#### Council on Addiction Psychiatry

Frances R. Levin, M.D.

#### Council on Advocacy and Government Relations

Barry B. Perlman, M.D.

*Advocacy and Litigation Funding*

Jeffrey Akaka, M.D.

#### Council on Children, Adolescents, and Their Families

Joseph V. Penn, M.D.

*Agnes Purcell McGavin Award*

Robert Lee Hendren, M.D.

*Blanche F. Ittleson Research Award*

Michael Houston, M.D.

#### Council on Communications

Arshya Vahabzadeh, M.D.

#### Council on Geriatric Psychiatry

Robert P. Roca, M.D.

#### Council on Healthcare Systems and Financing

Harsh K. Trivedi, M.D.

*Reimbursement for Psychiatric Care*

Bruce J. Schwartz, M.D.

*RBRVS, Codes and Reimbursement*

Gregory G. Harris, M.D.

#### Council on International Psychiatry

Michelle Riba, M.D.

#### Council on Medical Education and Lifelong Learning

Richard F. Summers, M.D.

*American Leadership Fellowship Selection*

Leah J. Dickstein, M.D., M.A.

*APA Public Psychiatry Fellowship Selection Committee*

Derri Shtasel, M.D.

*APA/SAMHSA Minority Fellowship Selection and Advisory*

Roberto Lewis-Fernandez, M.D.

*Scientific Program*

Steven Koh, M.D.

*Vestermark Award Committee*

Jonathan F. Borus, M.D.

#### Council on Minority Mental Health and Health Disparities

Christina V. Mangurian, M.D.

#### Council on Psychiatry and Law

Steven K. Hoge, M.D.

*Isaac Ray/Human Rights Award*

Liza Hannah Gold, M.D.

*Judicial Action*

Marvin S. Swartz, M.D.

*Manfred S. Guttmacher Award*

David A. Lowenthal, M.D.

#### Council on Psychosomatic Medicine (Consultation Liaison Psychiatry)

David F. Gitlin, M.D.

#### Council on Quality Care

Grayson Norquist, M.D.

*Mental Health Information Technology*

Steven Roy Daviss, M.D.

*Performance Measures*

Karen Pierce, M.D.

*Steering Committee on Practice Guidelines*

Michael J. Vergare, M.D.

#### Council on Research

Dwight L. Evans, M.D.

*Psychiatric Dimensions of Disasters*

Robert J. Ursano, M.D.

*Research Awards*

Matthew W. State, M.D.

# There's So Much More to AJP Than Meets the Page!

Visit *The American Journal of Psychiatry's* website on PsychiatryOnline for the following features!

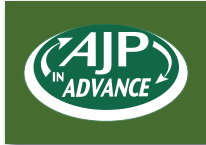

## AJP in Advance

The very latest research advances!

At **AJP in Advance**, you can discover the following before their appearance in print:

### **Mortality and Cumulative Exposure to Antipsychotics, Antidepressants, and Benzodiazepines in Patients With Schizophrenia: An Observational Follow-Up Study**

Both moderate and high levels of antipsychotic exposure were associated with substantially lower overall mortality rates, compared with no exposure, in patients with schizophrenia. Moderate and high antidepressant exposure levels were also associated with lower mortality rates in schizophrenia patients, but exposure to benzodiazepines showed a dose-response relationship with mortality.

### **Effect of Hippocampal and Amygdala Connectivity on the Relationship Between Preschool Poverty and School-Age Depression**

Severity of negative mood or depression in school-age children was predicted by greater preschool poverty and by current connectivity between the left hippocampus and right superior frontal cortex and between the right amygdala and right lingual gyrus. Connectivity mediated the relationship between preschool poverty and negative mood/depression.

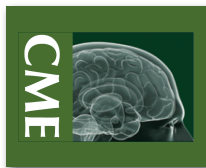

## AJP CME

Three articles in this issue form the basis of a short course with questions that can be answered for up to 1 *AMA PRA Category 1 Credit™* each by visiting <http://psychiatryonline.org/cme> and clicking on the "**American Journal of Psychiatry**" tab. CME credit is issued only **online**, and a paid subscription to AJP CME course program is required. This month's courses appear on pages 547–550.

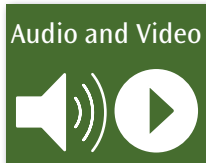

## Have You Heard?

With AJP Audio you can listen to highlights of this issue. This month, Executive Editor Michael Roy discusses a generalist model for treatment of borderline personality disorder, citalopram treatment for agitated patients with Alzheimer's dementia, buprenorphine for severe suicidal ideation and as an adjunctive treatment in cases of antidepressant nonresponse, effects of prenatal choline supplementation on early-childhood behavior problems, and mechanisms of executive system dysfunction across psychiatric disorders in youths.

Also, visit the online edition of this month's *Journal* to view a video of Deputy Editor Daniel S. Pine, M.D., presenting highlights from the issue.

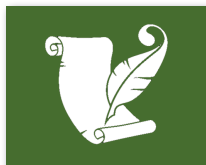

## Revisit the field's rich history!

### **75 years ago this month: "Early Behavior Problems as Signposts to Later Maladjustment"**

Dr. Leo Kanner, of Johns Hopkins Hospital, discusses the difficulty in predicting outcomes of children "with so-called neurotic manifestations"—symptoms vary widely, outcomes vary widely, and data are sparse—and describes some preliminary findings from "a follow-up system [that] was instituted in 1934 at the Children's Psychiatric Service."

### **50 years ago this month: "The Facade of Mental Retardation: Its Challenge to Child Psychiatry"**

Dr. Frank J. Menolascino, of the University of Nebraska College of Medicine, reports findings on more than 600 children who presented over a 5-year period to the Mental Retardation Clinical Evaluation Unit, concluding, "The child psychiatrist is in an ideal position to employ the present clinical and theoretical bodies of knowledge concerning the psychosocial factors that can produce mental retardation, and formulate meaningful programs of treatment and prevention."

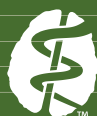

Source: https://psychiatryonline.org/doi/suppl/10.1176/ajp.2016.173.issue-5/suppl_file/front.pdf
